# Supplementary material
Source: PubMed Central journal article supplement (PMC2443103)
Supplement: NIHMS50834-supplement-2.pdf [file NIHMS50834-supplement-2.pdf]

## Epidemiology of basal-like breast cancer

Robert C. Millikan · Beth Newman · Chiu-Kit Tse · Patricia G. Moorman ·  
Kathleen Conway · Lynn G. Dressler · Lisa V. Smith · Miriam H. Lobbok ·  
Joseph Geradts · Jeannette T. Bensen · Susan Jackson · Sarah Nyante ·  
Chad Livasy · Lisa Carey · H. Shelton Earp · Charles M. Perou

Published online: 24 October 2007  
© Springer Science+Business Media, LLC. 2007

### Erratum to: Breast Cancer Res Treat DOI 10.1007/s10549-007-9632-6

Author Lynn G. Dressler was not listed in the original article.

---

The online version of the original article can be found under doi:  
[10.1007/s10549-007-9632-6](https://doi.org/10.1007/s10549-007-9632-6).

---

R. C. Millikan (✉) · C.-K. Tse · K. Conway ·  
J. T. Bensen · S. Jackson · S. Nyante  
Department of Epidemiology, CB #7435, School of Public  
Health, University of North Carolina, Chapel Hill, NC  
27599-7435, USA  
e-mail: millikan@email.unc.edu

R. C. Millikan · K. Conway · L. G. Dressler ·  
J. T. Bensen · S. Jackson · H. S. Earp · C. M. Perou  
Lineberger Comprehensive Cancer Center, School of Medicine,  
University of North Carolina, Chapel Hill, NC, USA

B. Newman  
School of Public Health, Queensland University of Technology,  
Kelvin Grove, Queensland, Australia

P. G. Moorman  
Department of Community and Family Medicine, School  
of Medicine, Duke University, Durham, NC, USA

L. V. Smith  
Division of Chronic Disease and Injury Prevention, Department  
of Public Health, Los Angeles County, Los Angeles, CA, USA

L. V. Smith  
Department of Epidemiology, School of Public Health,  
University of California, Los Angeles, CA, USA

M. H. Lobbok  
Center for Infant and Young Child Feeding and Care,  
Department of Maternal and Child Health, School of Public  
Health, University of North Carolina, Chapel Hill, NC, USA

J. Geradts  
Department of Pathology, School of Medicine, Duke University,  
Durham, NC, USA

C. Livasy  
Department of Pathology and Lab Medicine, University of North  
Carolina, Chapel Hill, NC, USA

L. Carey  
Department of Oncology, School of Medicine, University  
of North Carolina, Chapel Hill, NC, USA

C. M. Perou  
Department of Genetics, University of North Carolina, Chapel  
Hill, NC, USA
